# Supplementary material for: Characterization of nickel(ii)-acylperoxo species relevant to catalytic alkanehydroxylation by nickel complex with mCPBA
Source: Royal Society of Chemistry journal article supplement (doi:10.1039/c2dt32419a), 2012-11-21
Supplement: c2dt32419a.pdf [file c2dt32419a.pdf]

## Supporting information

### *Experimental details*

#### **X-ray data collections and structural determinations.**

Diffraction data for crystals of the nickel(II)-chlorido complex with  $\text{Tp}^{\text{Me}_2,\text{Br}}$  derived from toluene (=  $\mathbf{3}^{\text{Br}} \cdot 0.5\text{toluene}$ ) and an EtOH adduct of the nickel(II)-*m*CBA complex with  $\text{Tp}^{\text{Me}_2,\text{Br}}$  derived from EtOH (=  $\mathbf{4}^{\text{Br}}(\text{EtOH})_2$ ) were collected using a Rigaku Satarn 70 CDD area detector system with graphite monochromated Mo-K $\alpha$  radiation. The crystals were mounted on loops using liquid paraffin flash cooled to 113 K and the data collections were carried at the same temperature. Diffraction measurement of the nickel(II)-*m*CBA complex with  $\text{Tp}^{\text{iPr}_2}$  derived from pentane (=  $\mathbf{4}^{\text{H}}$ ) was made on a Rigaku RAXIS IV imaging plate area detector with Mo K $\alpha$  radiation. The crystal was mounted on glass fiber and data collection was carried out at 213 K.

Crystallographic data and the result of refinement are summarized in Table S-1. Structure analyses were performed by using Win-GX program package.<sup>1</sup> The structures of the complexes were solved by the direct methods using SIR-92 program.<sup>2</sup> The structures were refined on  $F^2$  with full-matrix least-squares methods using SHELXL-97.<sup>3,4</sup> All non-hydrogen atoms except the carbon atoms of a disordered toluene molecule were refined anisotropically. Hydrogen atoms on the pyrazoly and phenyl groups were added in the riding model with C–H = 0.96 Å (for methyl groups), 0.98 Å (for methine groups) or 0.93 Å (for aromatic rings) with  $U_{\text{iso}}(\text{H}) = 1.2 U_{\text{iso}}(\text{attached atom})$ . Hydrogen atoms attached on the boron centers of  $\text{Tp}^{\text{R}}$  and on the oxygen atoms of EtOH were refined isotropically. CCDC 874059 ( $\mathbf{3}^{\text{Br}} \cdot 0.5\text{toluene}$ ), CCDC 874060 ( $\mathbf{4}^{\text{Br}}(\text{EtOH})_2$ ), and CCDC 163522 ( $\mathbf{4}^{\text{H}}$ ) contain the supplementary crystallographic data for this paper. The deposited data can be obtained free of charge from The Cambridge Crystallographic Data Centre via [www.ccdc.cam.ac.uk/data\\_request/cif](http://www.ccdc.cam.ac.uk/data_request/cif).

#### **References for supporting information**

- 1 L. J. Farrugia, *J. Appl. Crystallogr.*, 1999, **32**, 837–838.
- 2 A. Altomare, M. C. Burla, M. Camalli, M. Cascarano, C. Giacovazzo, A. Guagliardi and G. Polidori, *J. Appl. Crystallogr.*, 1994, **27**, 435–436.
- 3 G. M. Sheldrick, SHELXL-97, University of Göttingen, Germany, 1997.
- 4 G. M. Sheldrick, *Acta. Crystallogr.*, 2008, **A64**, 112–122.

**Table S1** Crystallographic data

|                                       | <b>3<sup>Br</sup>·0.5toluene</b>                                       | <b>4<sup>Br</sup>(EtOH)<sub>2</sub></b>                                            | <b>4<sup>H</sup></b>                                               |
|---------------------------------------|------------------------------------------------------------------------|------------------------------------------------------------------------------------|--------------------------------------------------------------------|
| Formula                               | C <sub>16.5</sub> H <sub>23</sub> BBr <sub>3</sub> ClN <sub>6</sub> Ni | C <sub>26</sub> H <sub>35</sub> BBr <sub>3</sub> ClN <sub>6</sub> NiO <sub>4</sub> | C <sub>34</sub> H <sub>50</sub> BClN <sub>6</sub> NiO <sub>2</sub> |
| Formula weight                        | 674.13                                                                 | 840.30                                                                             | 679.77                                                             |
| Crystal system                        | Monoclinic                                                             | Triclinic                                                                          | Monoclinic                                                         |
| Space group                           | P2 <sub>1</sub> /a (#14)                                               | P $\bar{1}$ (#2)                                                                   | P2 <sub>1</sub> /n (#14)                                           |
| a/Å                                   | 10.8874(14)                                                            | 10.897(5)                                                                          | 12.3257(10)                                                        |
| b/Å                                   | 19.586(3)                                                              | 11.565(5)                                                                          | 18.8319(16)                                                        |
| c/Å                                   | 12.2781(16)                                                            | 14.060(5)                                                                          | 15.697(2)                                                          |
| α/°                                   | 90                                                                     | 78.696(5)                                                                          | 90                                                                 |
| β/°                                   | 90.982(4)                                                              | 71.796(5)                                                                          | 95.5920(10)                                                        |
| γ/°                                   | 90                                                                     | 82.924(5)                                                                          | 90                                                                 |
| V/Å <sup>3</sup>                      | 2617.8(6)                                                              | 1646.9(12)                                                                         | 3626.1(6)                                                          |
| Z                                     | 4                                                                      | 2                                                                                  | 4                                                                  |
| D (calc.)/g cm <sup>-3</sup>          | 1.710                                                                  | 1.695                                                                              | 1.245                                                              |
| μ(Mo-Kα)/mm <sup>-1</sup>             | 5.440                                                                  | 4.350                                                                              | 0.646                                                              |
| Unique reflections                    | 5921                                                                   | 6621                                                                               | 7240                                                               |
| Reflections <i>I</i> > 2σ( <i>I</i> ) | 5720                                                                   | 6434                                                                               | 5422                                                               |
| Parameters refined                    | 260                                                                    | 399                                                                                | 419                                                                |
| R ( <i>I</i> > 2σ( <i>I</i> ))        | 0.0552                                                                 | 0.0340                                                                             | 0.0513                                                             |
| R (for all data)                      | 0.0570                                                                 | 0.0350                                                                             | 0.0722                                                             |
| wR ( <i>I</i> > 2σ( <i>I</i> ))       | 0.1423                                                                 | 0.0899                                                                             | 0.1319                                                             |
| wR (for all data)                     | 0.1444                                                                 | 0.0909                                                                             | 0.1391                                                             |
| GOF                                   | 1.115                                                                  | 1.107                                                                              | 1.044                                                              |

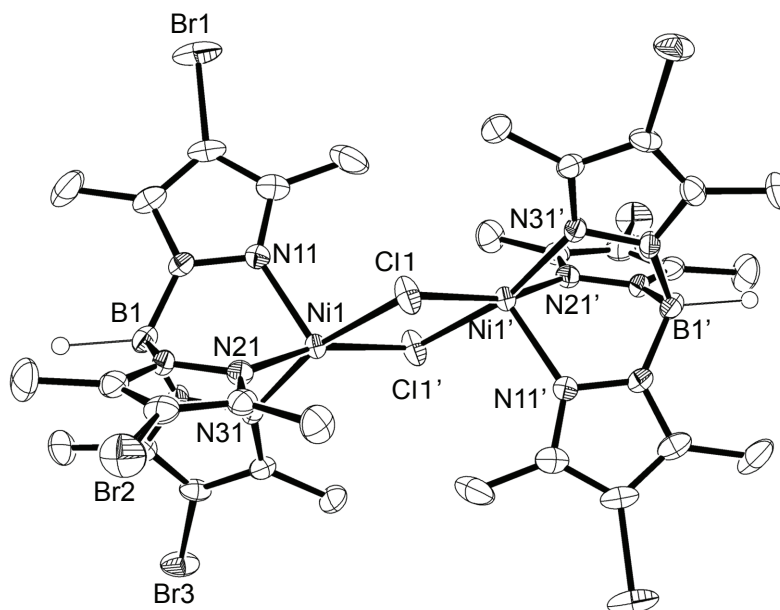

**Fig. S1** Dimeric structure of  $3^{\text{Br}}$  drawn at the 30% probability level. All hydrogen atoms except boron-bounded ones on  $\text{Tp}^{\text{Me}_2, \text{Br}}$  are omitted for clarity. The analyzed crystals obtained from a toluene solution exhibited green color due to five-coordinated nickel(II) centers. However,  $3^{\text{Br}}$  had a monomeric structure with pseudo-tetrahedral nickel(II) center in the non-coordinating solvent such as toluene and  $\text{CH}_2\text{Cl}_2$  as was supported by reddish brown solution color similar to that of the previously reported tetrahedral nickel(II)-bromido complex with  $\text{Tp}^{\text{Me}_2}$ , namely  $[\text{Ni}^{\text{II}}(\text{Br})(\text{Tp}^{\text{Me}_2})]$  (P. J. Desrochers, J. Telser, S. A. Zvyagin, A. Ozarowski, J. Krzystek and D. A. Vivic, *Inorg. Chem.*, 2006, **45**, 8930 – 8941).

**Table S2** Selected bond lengths (Å) and angles(deg) for  $3^{\text{Br}} \cdot 0.5\text{toluene}$ .

| Lengths (Å)  |            |              |            |
|--------------|------------|--------------|------------|
| Ni1–N11      | 2.011(3)   | Ni1–N21      | 2.063(3)   |
| Ni1–N31      | 2.061(3)   | Ni1–Cl1      | 2.3792(11) |
| Ni1–Cl1'     | 2.3611(11) | Ni1···Ni1'   | 3.5415(10) |
| Angles (deg) |            |              |            |
| N11–Ni1–N21  | 92.28(14)  | N11–Ni1–N31  | 92.16(13)  |
| N11–Ni1–Cl1  | 101.91(11) | N11–Ni1–Cl1' | 104.84(11) |
| N21–Ni1–N31  | 86.99(13)  | N21–Ni1–Cl1  | 92.07(9)   |
| N21–Ni1–Cl1' | 162.83(10) | N31–Ni1–Cl1  | 165.93(10) |
| N31–Ni1–Cl1' | 93.48(9)   | Cl1–Ni1–Cl1' | 83.32(4)   |

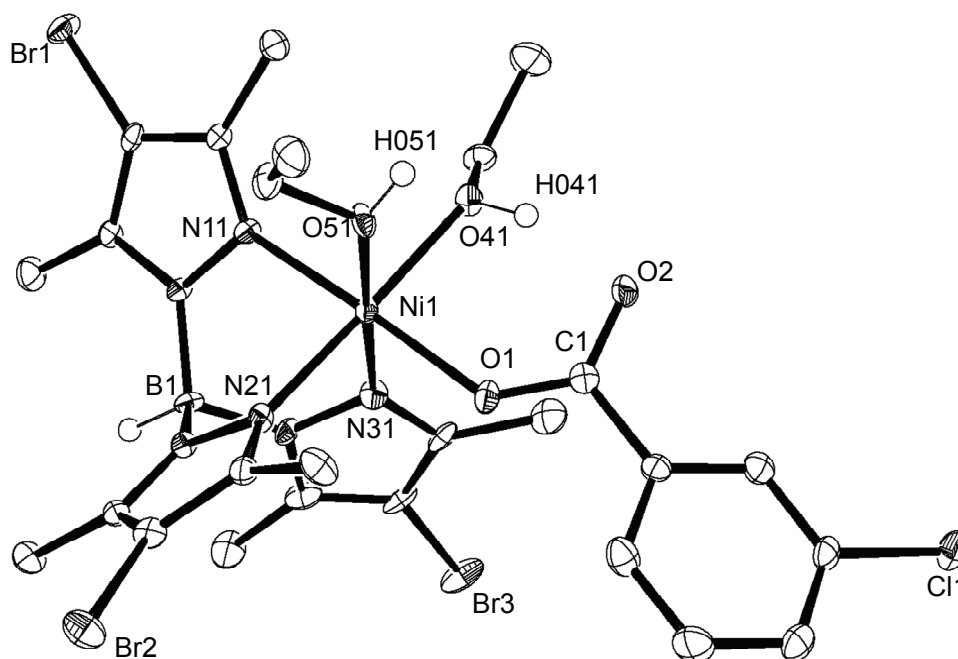

**Fig. S2** Molecular structure of  $4^{\text{Br}}(\text{EtOH})_2$  drawn at the 30% probability level. Hydrogen atoms except those attached on the oxygen atoms of the coordinated EtOH molecules (i.e. O41 and O51) and the boron of  $\text{Tp}^{\text{Me}_2,\text{Br}}$  (i.e. B1) are omitted for clarity.

**Table S3** Selected bond lengths (Å) and angles(deg) for  $4^{\text{Br}}(\text{EtOH})_2$ .

| Lengths (Å)  |            |             |            |
|--------------|------------|-------------|------------|
| Ni1–N11      | 2.092(2)   | Ni1–N21     | 2.086(2)   |
| Ni1–N31      | 2.092(2)   | Ni1–O1      | 2.3792(11) |
| Ni1–O41      | 2.0838(18) | Ni1–O51     | 2.1209(18) |
| Angles (deg) |            |             |            |
| N11–Ni1–N21  | 89.26(8)   | N11–Ni1–N31 | 88.17(8)   |
| N11–Ni1–O1   | 177.89(7)  | N11–Ni1–O41 | 91.96(8)   |
| N11–Ni1–O51  | 94.03(8)   | N21–Ni1–N31 | 88.97(8)   |
| N21–Ni1–O1   | 89.05(8)   | N21–Ni1–O41 | 174.02(7)  |
| N21–Ni1–O51  | 90.65(8)   | N31–Ni1–O1  | 90.53(8)   |
| N31–Ni1–O41  | 96.91(8)   | N31–Ni1–O51 | 177.77(8)  |
| O1–Ni1–O41   | 89.85(7)   | O1–Ni1–O51  | 87.26(8)   |
| O41–Ni1–O51  | 83.42(7)   |             |            |

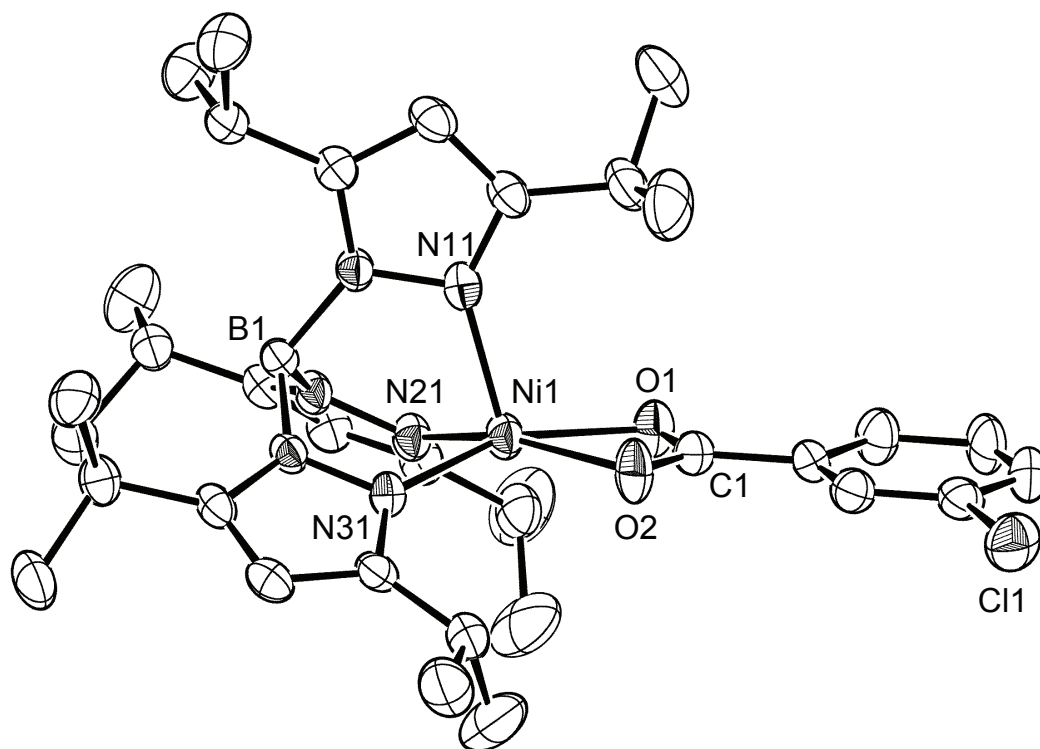

**Fig. S3** Molecular structure of  $4^{\text{H}}$  drawn at the 30% probability level. All hydrogen atoms are omitted for clarity.

**Table S4** Selected bond lengths (Å) and angles(deg) for  $4^{\text{H}}$ .

| Lengths (Å)  |           |             |            |
|--------------|-----------|-------------|------------|
| Ni1–N11      | 2.012(2)  | Ni1–N21     | 2.011(2)   |
| Ni1–N31      | 2.015(2)  | Ni1–O1      | 2.0908(18) |
| Ni1–O2       | 2.085(2)  |             |            |
| Angles (deg) |           |             |            |
| N11–Ni1–N21  | 90.19(9)  | N11–Ni1–N31 | 92.51(8)   |
| N11–Ni1–O1   | 106.20(8) | N11–Ni1–O2  | 107.34(9)  |
| N21–Ni1–N31  | 92.06(9)  | N21–Ni1–O1  | 100.41(8)  |
| N21–Ni1–O2   | 158.32(8) | N31–Ni1–O1  | 157.32(9)  |
| N31–Ni1–O2   | 99.62(8)  | O1–Ni1–O2   | 63.00(7)   |

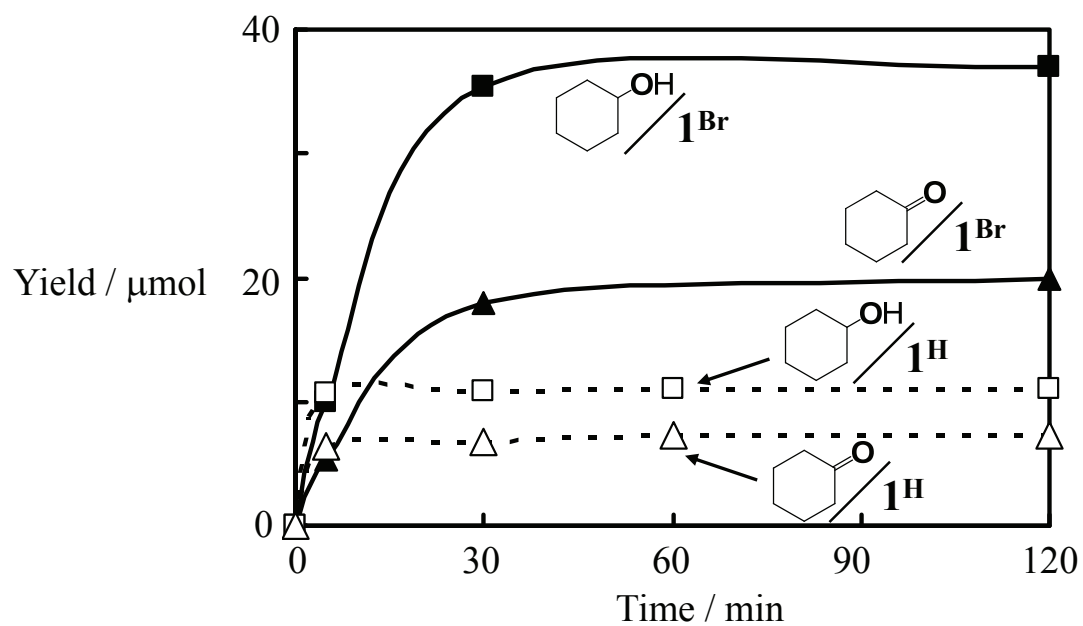

**Fig. S4** Time course of the oxygenation of cyclohexane with mCPBA mediated by  $1^X$  ( $X = \text{H}, \text{Br}$ ) in  $\text{CF}_3\text{C}_6\text{H}_5$ . Conditions:  $[1^X] = 5.2 \text{ mM}$  in 5 mL of  $\text{C}_6\text{H}_5\text{CF}_3$ , Ni: mCPBA: $\text{C}_6\text{H}_{12} = 1:5:50$ , at 313 K, under argon.

(a) Reaction mediated by  $1^H$

$H_2^{16}O$  (control)

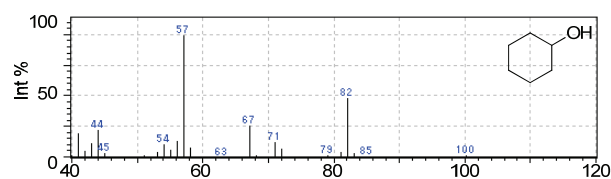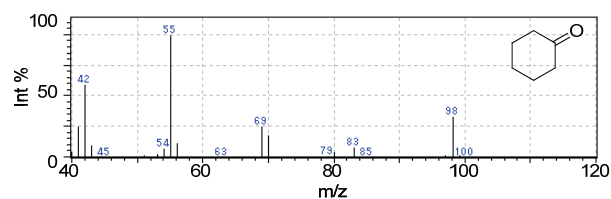

$H_2^{18}O$

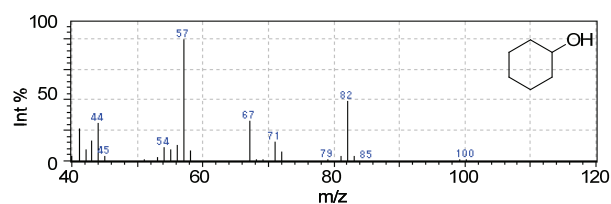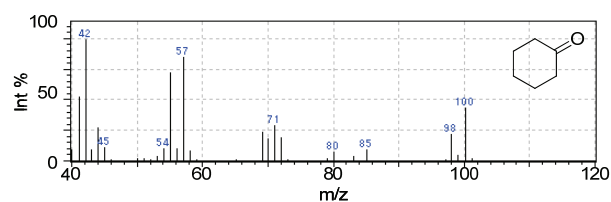

(b) Reaction mediated by  $1^{Br}$

$H_2^{16}O$  (control)

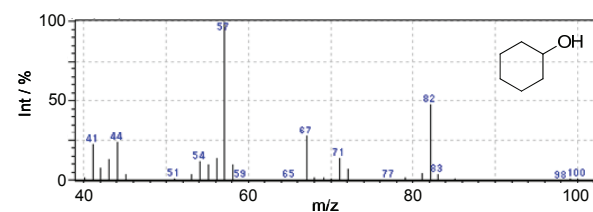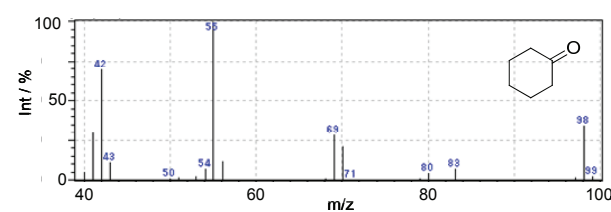

$H_2^{18}O$

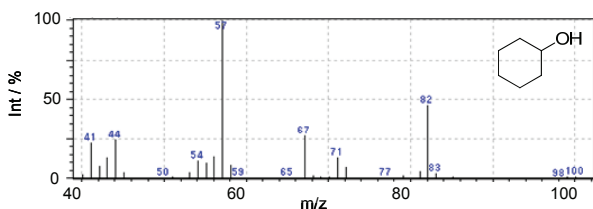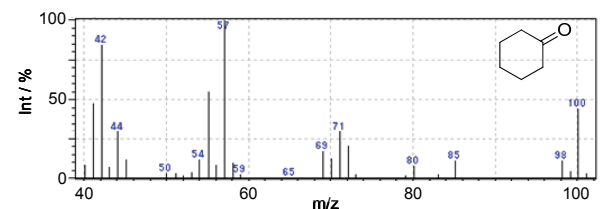

**Fig. S5** GC-MS spectra of the products obtained by oxygenation of cyclohexane with *m*CPBA mediated by  $1^X$  in the presence of  $H_2^{18}O$ . Reactions in the presence of  $H_2^{16}O$  were also examined as control. Conditions:  $[1^X] = 2.6$  mM in 1 mL of  $CH_2Cl_2$ , Ni:*m*CPBA: $H_2O$ : $C_6H_{12} = 1:50:500:2500$ , at 313 K, under argon. In a mass spectrum of cyclohexanol products, any signals attributed to the  $^{18}O$ -incorporated compounds could not be detected. In the spectra of cyclohexanone, a peak at  $m/z = 100$  could be assigned as  $^{18}O$ -cyclohexanone.

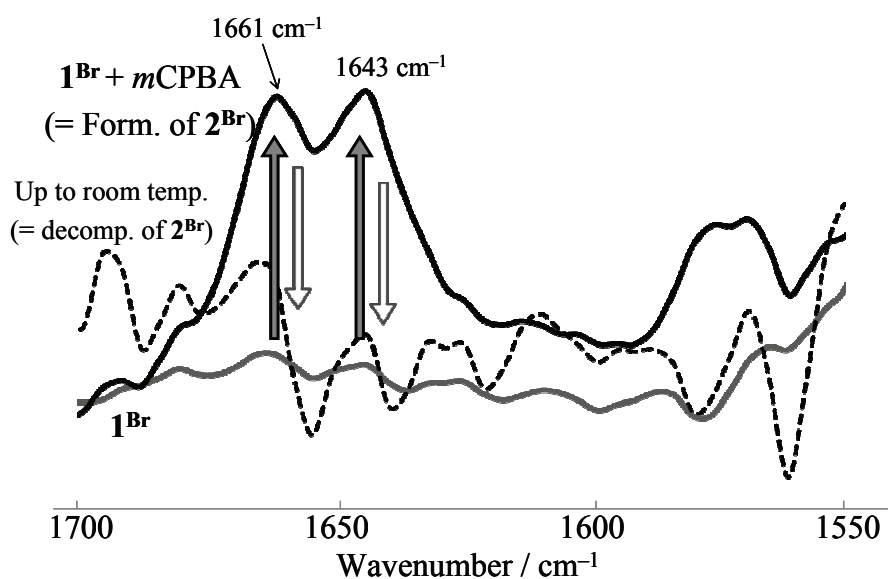

**Fig. S6** IR spectra of the CH<sub>2</sub>Cl<sub>2</sub> solutions of *in situ* generated 2<sup>Br</sup> (formed by the reaction of 1<sup>Br</sup> with 2 equiv of *m*CPBA; top; black line), the parent 1<sup>Br</sup> (bottom; gray line), and the sample once warmed up to room temperature (recorded at 223 K; dashed line). Both peaks at 1661 and 1643 cm<sup>-1</sup> disappeared by warm up of the solution. Therefore, we assigned the both peaks were attributed to the νC=O bands of the thermally unstable nickel(II)-acylperoxo species 2<sup>Br</sup>, and one of two peaks might attribute to an aqua ligand adduct of 2<sup>Br</sup>.

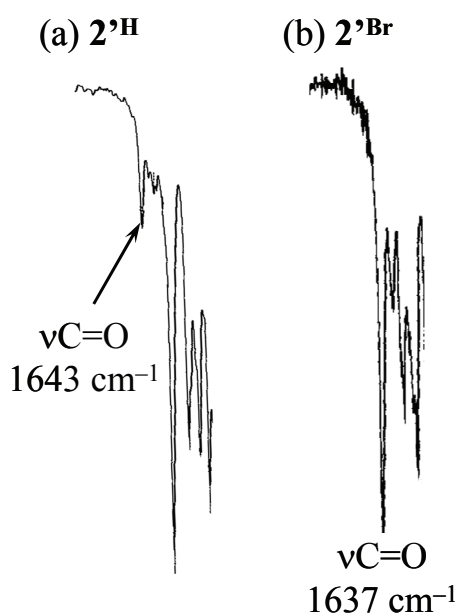

**Fig. S7** IR spectra of the KBr pellet samples of 2<sup>H</sup> (a; left) and 2<sup>Br</sup> (b; right).



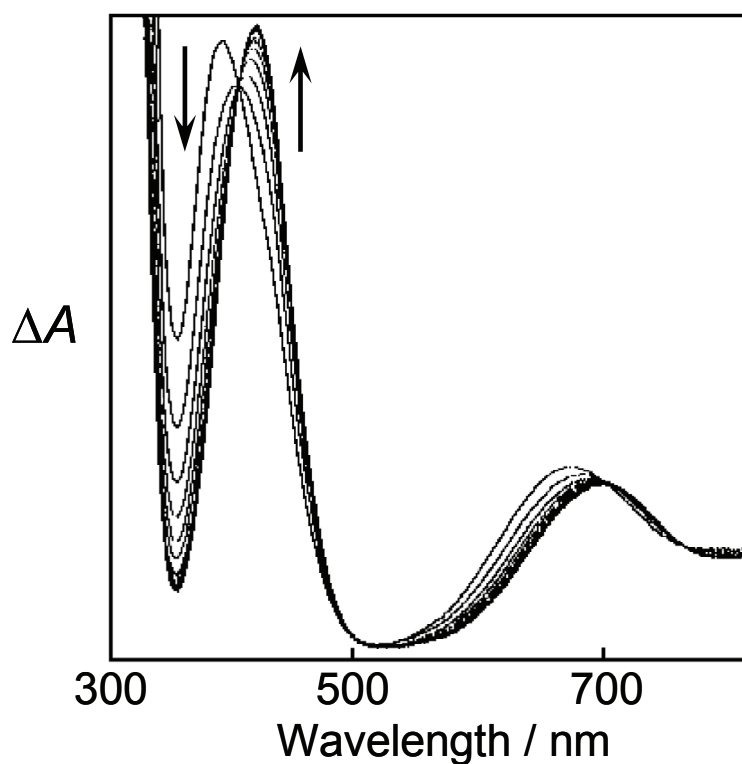

**Fig. S8** Decay of  $2^{\text{H}}$  in  $\text{Et}_2\text{O}$  observed by time course UV/Vis spectra. Increasing absorbance at 429 nm indicated the formation of the mCBA complexes  $4^{\text{H}}$  and  $5^{\text{H}}$ .

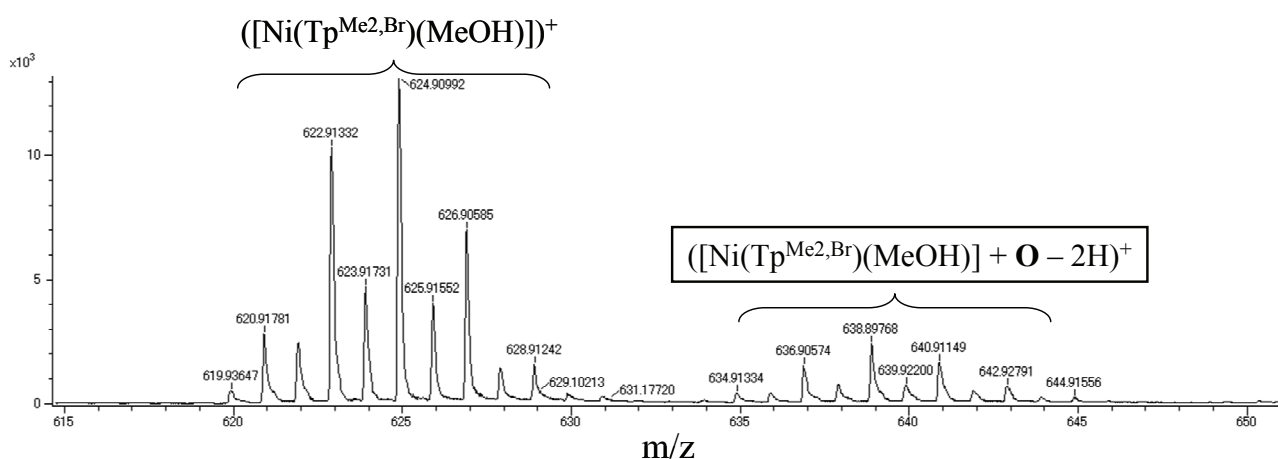

**Fig. S9** ESI-MS spectrum of the decomposed products of  $2^{\text{Br}}$  derived from the  $\text{CD}_2\text{Cl}_2$  solution.

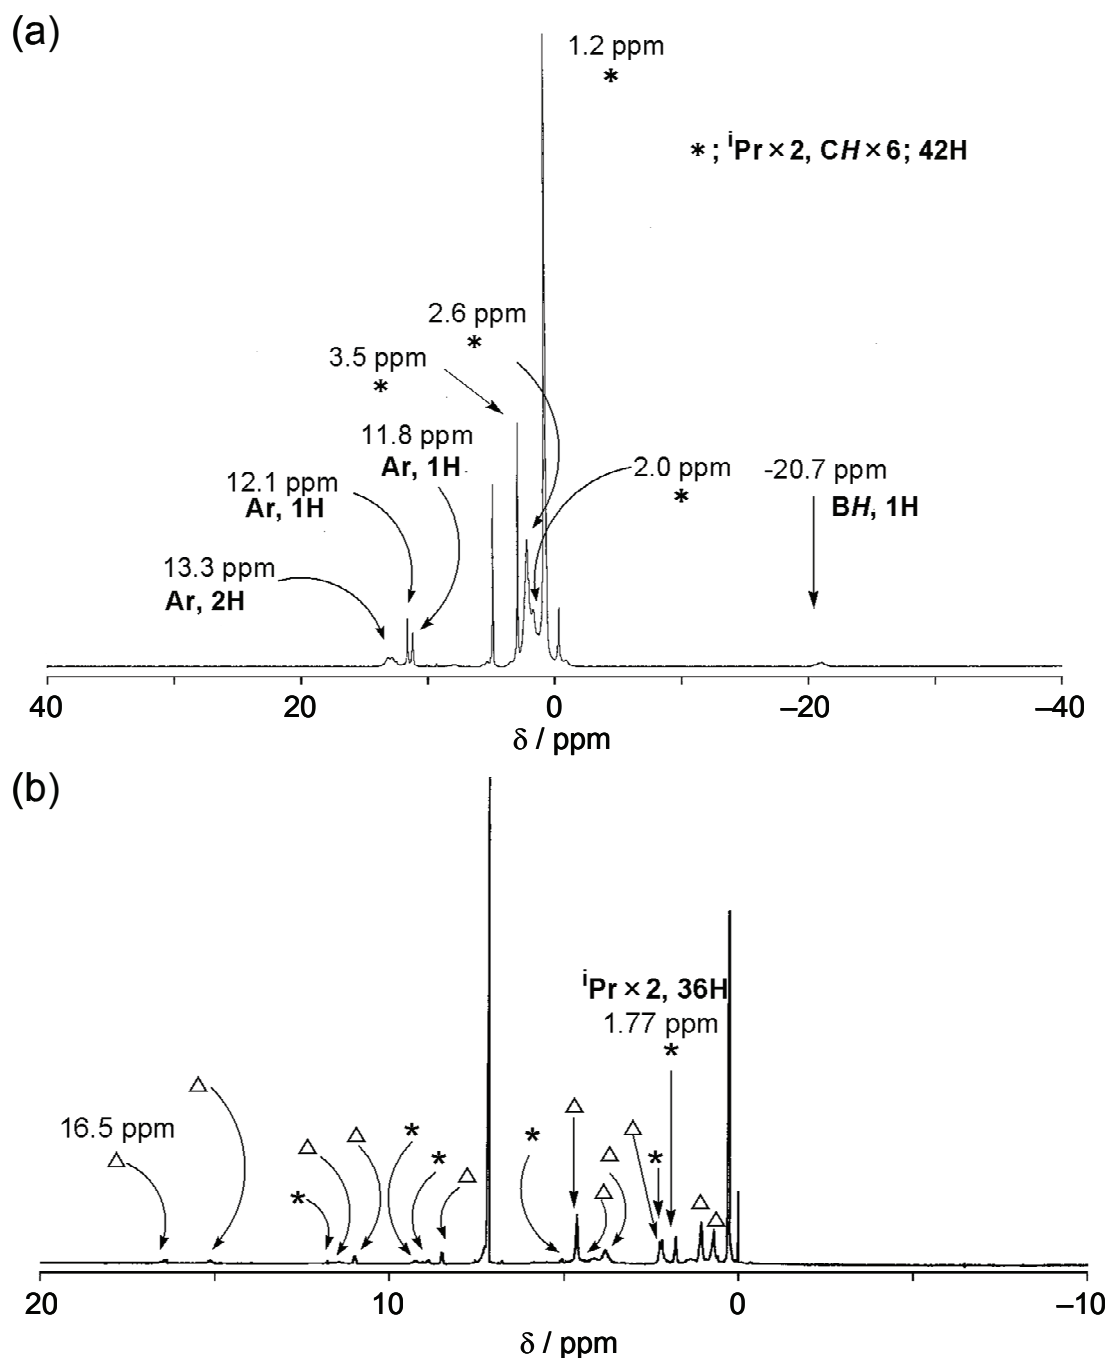

**Fig. S10**  $^1\text{H}$  NMR spectra of  $2^{\text{Br}}$  and its decomposed products mixture. (a)  $\text{CD}_2\text{Cl}_2$  solution of  $2^{\text{Br}}$  recorded at 233 K. (b) Decomposed products mixture obtained from  $\text{Et}_2\text{O}$  solution of  $2^{\text{Br}}$  by standing at ambient temperature for one day under Ar and then evaporation. The spectrum was recorded at room temperature in  $\text{C}_6\text{D}_6$ . Marked signals denote the protons of  $4^{\text{Br}}$  (\*) and  $5^{\text{Br}}$  ( $\Delta$ ), respectively.

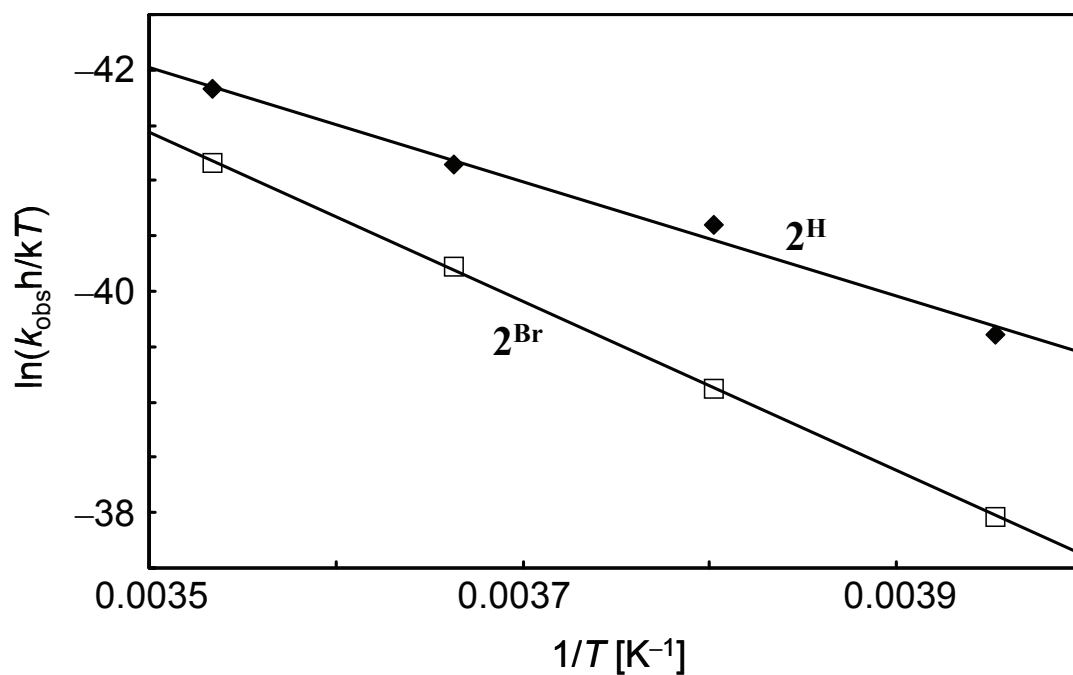

**Fig. S11** Eyring plots for the thermolysis of  $2^X$  in  $\text{CH}_2\text{Cl}_2$ .

**Table S5** Activation parameters the thermolysis of  $2^X$  in  $\text{CH}_2\text{Cl}_2$ .

| Activation parameters                                 | $2^H$     | $2^{Br}$ |
|-------------------------------------------------------|-----------|----------|
| $\Delta H^\ddagger / \text{kcal}\cdot\text{mol}^{-1}$ | 10.2(7)   | 15.2(2)  |
| $\Delta S^\ddagger / \text{e.u.}$                     | -31.6(28) | -15.6(7) |
| $E_a / \text{kcal}\cdot\text{mol}^{-1}$               | 10.8(7)   | 15.7(2)  |
| $\ln A$                                               | 14.4(14)  | 22.5(4)  |
